# Supplementary material
Source: Springer Nature journal article supplement (https://www.springermedizin.de/resource/supplementary/13048_2009_29_MOESM1_ESM.pdf/9664740)

### A *Areg*

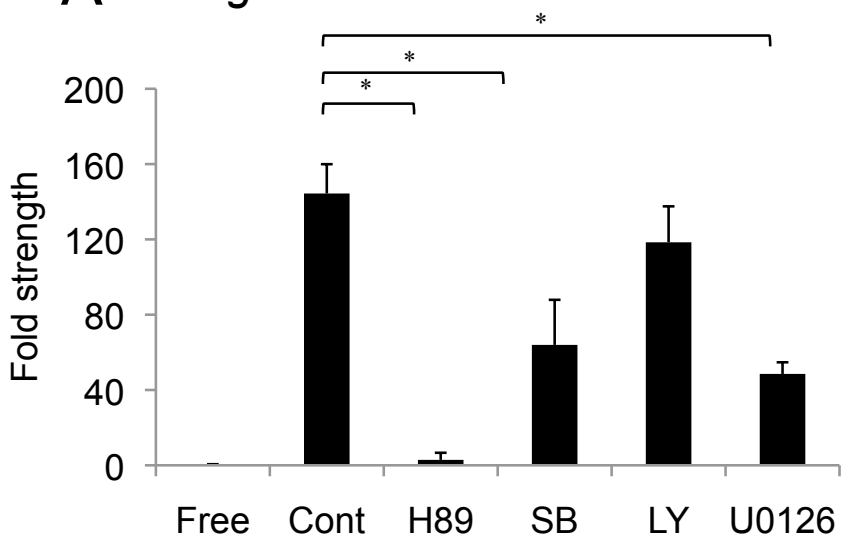

### B *Ereg*

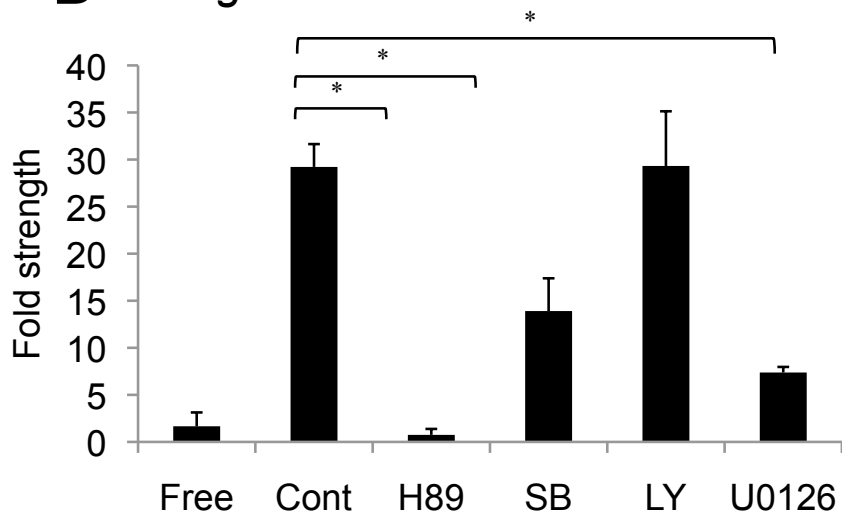

### C *Tace/Adam17*

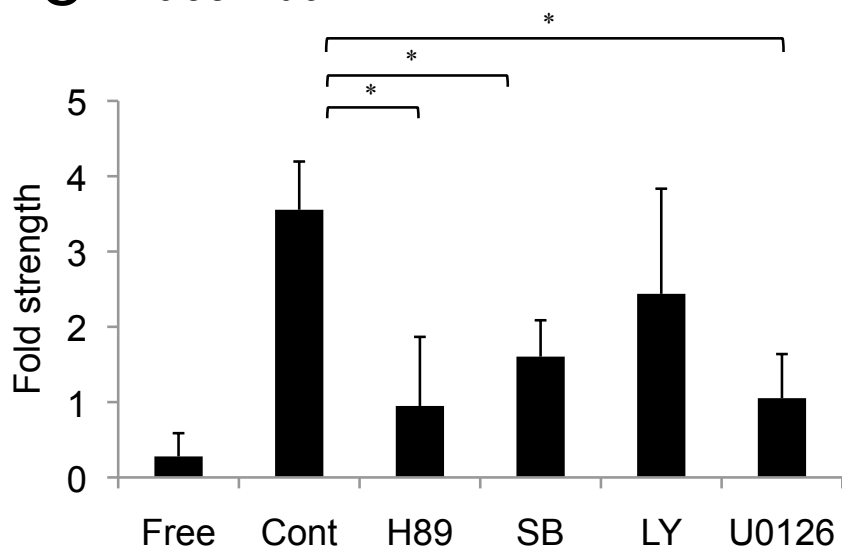

Supplement: MOESM1 [file 9664740]
